## **Comparison of Knowledge, attitude and anticipation practices of drug prevention regarding Tuberculosis (TB)**

**Sana Naseem<sup>1</sup>, Hafiz Muhammad Affif<sup>2</sup>, Abdul Ghaffar Khan<sup>1</sup>**

1. Holy Family Hospital, Rawalpindi
2. Rawalpindi Medical University

Corresponding Author: Sana Naseem, Holy Family hospital, Rawalpindi.

medRxiv has withdrawn this preprint because we have been unable to obtain satisfactory evidence from the authors of their identity. Therefore, this work should not be cited as a reference for this project.
